# Supplementary material for: Metabolic Reprograming Via Silencing of Mitochondrial VDAC1 Expression Encourages Differentiation of Cancer Cells
Source: PubMed Central journal article supplement (PMC6562189; doi:10.1016/j.omtn.2019.05.003), 2019-05-18
Supplement: mmc1.pdf [file mmc1.pdf]

**OMTN, Volume 17**

**Supplemental Information**

**Metabolic Reprograming Via Silencing  
of Mitochondrial VDAC1 Expression  
Encourages Differentiation of Cancer Cells**

**Tasleem Arif, Zohar Amsalem, and Varda Shoshan-Barmatz**

## Supplementary Data

### Metabolic Reprogramming via Silencing of Mitochondrial VDAC1 Expression

### Encourages Differentiation of Cancer Cells

Tasleem Arif,\* Zohar Amsalem\* and Varda Shoshan-Barmatz#

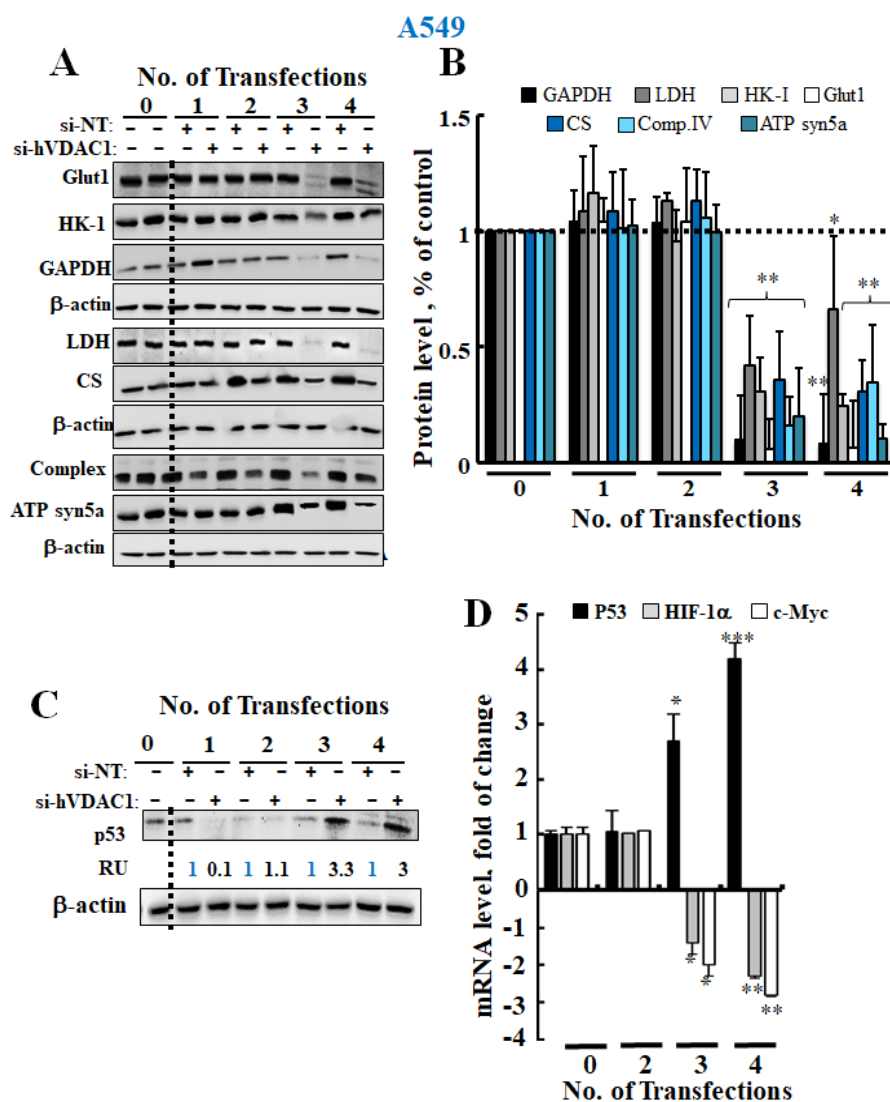

**Figure S1. si-hVDAC1 Treatment of A549 Cells Reprogrammed Metabolism and Altered TF Expression Following the Third and Fourth Transfections**

Immunoblotting (A) and quantitative analysis (B) of Glut-1, HK-I, GAPDH, LDH-A, CS, complex IVc and ATP 5a synthase in si-NT- or si-hVDAC1-treated A549 cells following the indicated transfection.  $\beta$ -actin served as an internal loading control. Results reflect the mean  $\pm$  SEM. The dashed line indicates the level in the controls. (C) Immunoblot analysis of p53 levels in si-NT- and si-hVDAC1-treated A549 cells following the indicated transfection. RU represents the relative units (RU) of expression of the indicated protein in si-hVDAC1-treated A549 cells relative to si-NT-treated A549 cells. (D) TF mRNA expression levels as analyzed using qRT-PCR with specific primers. The levels of p53 (black bar), HIF-1 $\alpha$  (gray bar) and c-Myc (white bar) in si-hVDAC1-treated A549 cells relative to those in si-NT-treated A549 cells following the indicated transfection were determined. Results reflect the mean  $\pm$  SEM,  $p^* \leq 0.05$ ;  $p^{**} \leq 0.01$ ;  $p^{***} \leq 0.001$ .

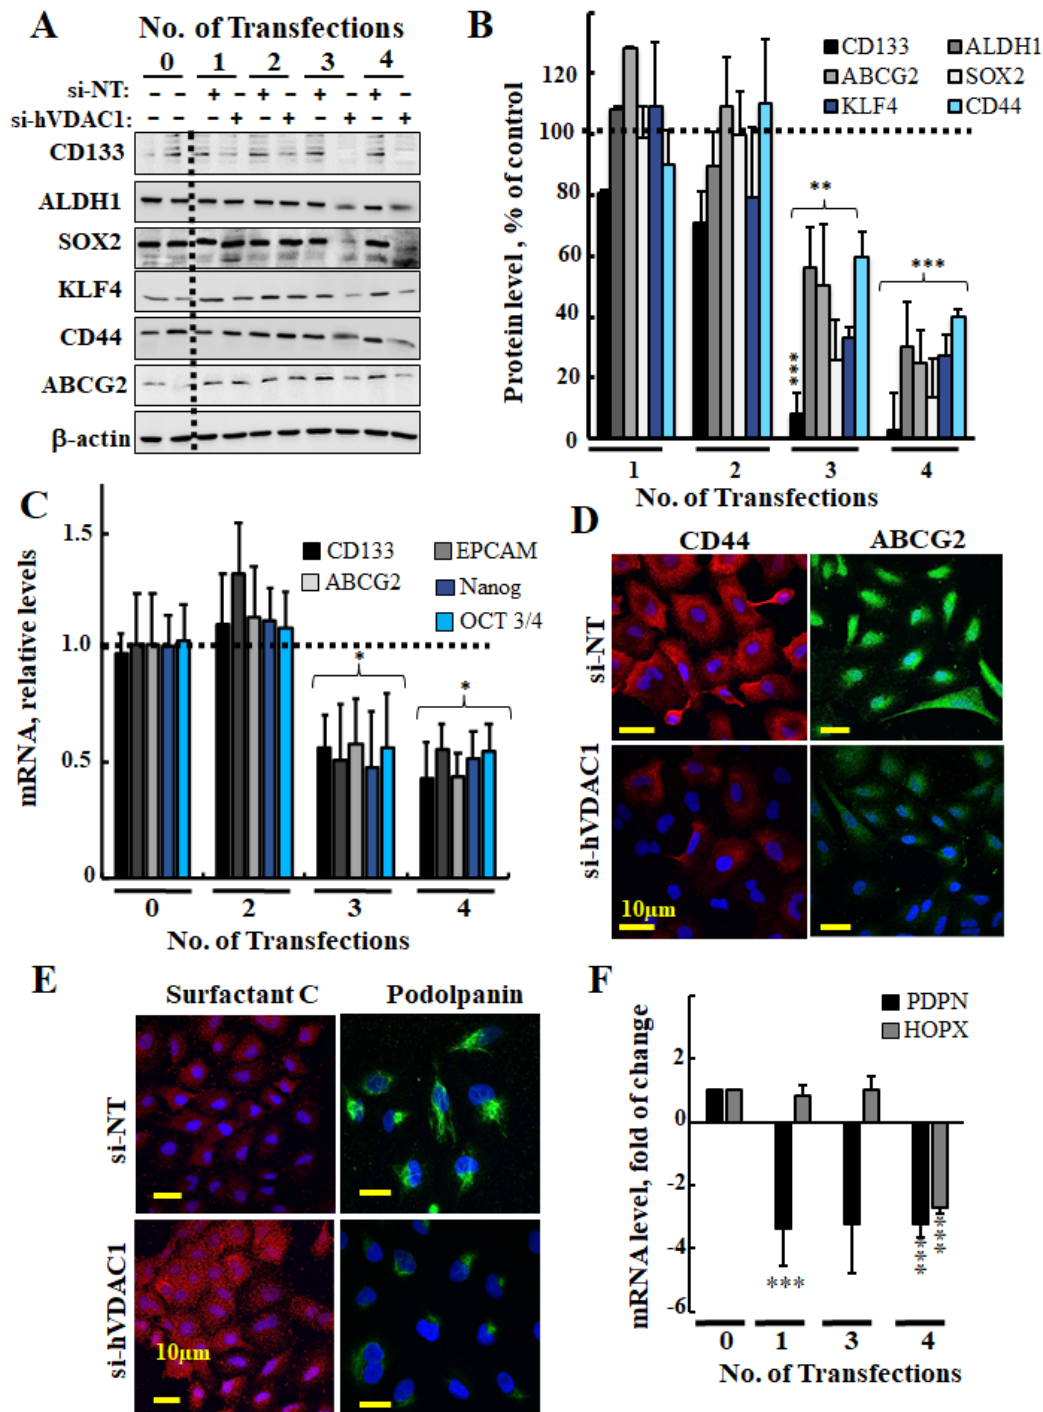

**Figure S2. si-hVDAC1 Treatment of A549 Cells Markedly Reduced the Expression of CSC Markers and Proteins Associated with Differentiation Following the Third and Fourth Transfections**

Immunoblotting (A) and quantitative analysis (B) of selected CSC markers (CD133, ALDH1, SOX2, KLF4, CD44 and ABCG2) in si-NT- and si-hVDAC1-treated A549 cells at the indicated transfection, using specific antibodies. β-actin served as an internal loading control. The dashed line indicates the level in the controls. (C) q-RT-PCR of mRNA levels of CSC markers (CD133, EPCAM, ABCG2, Nango and Oct3/4) in A549 cells treated with si-NT or si-hVDAC1 for the indicated number of transfections, and presented relative to their levels in si-NT-treated cells. Results reflect the mean ± SEM,  $p \leq 0.05$ . (D,E) IF staining of si-NT- and si-hVDAC1-treated cells following the fourth transfection stained for CD44 and ABCG2 (D) and surfactant C, and for podoplanin after third transfection (E), as visualized by confocal microscopy. (F) qRT-PCR analysis of mRNA levels of podoplanin (PDPN, black bar), and homedomain only protein x (HOPX, gray bar) in si-hVDAC1-treated A549 cells, relative to those in si-NT-treated A549 cells, following the indicated transfection. Results reflect the means ± SEM;  $p^{**} \leq 0.01$ ;  $p^{***} \leq 0.001$ .

**Table S1. Summary of the Genes Expression Levels Associated with Metabolism, Stem Cells, Differentiation and Transcription Factors as a Function of Number of Transfections of MDA-MB231 Cells with si-hVDAC1, Relative to Transfection with si-NT; q-PCR Results**

| Transfection No        | Fold change si-NT/si-hVDAC1 |              |               |               |
|------------------------|-----------------------------|--------------|---------------|---------------|
|                        | 0                           | 2            | 3             | 4             |
| <b>Gene</b>            |                             |              |               |               |
| <b>Metabolism</b>      |                             |              |               |               |
| Glut1                  | 1.00 ± 0.15                 | -0.56 ± 0.61 | -1.05 ± 0.51  | -2.74 ± 0.34  |
| HK-1                   | 1.00 ± 0.36                 | -1.07 ± 0.06 | -3.84 ± 0.14  | -9.86 ± 0.15  |
| GAPDH                  | 1.00 ± 0.08                 | -1.83 ± 0.29 | -3.66 ± 0.26  | -10.59 ± 0.05 |
| LDH                    | 1.00 ± 0.07                 | -0.67 ± 0.10 | -1.34 ± 0.08  | -2.72 ± 0.22  |
| CS                     | 1.00 ± 0.22                 | -0.78 ± 0.13 | -1.01 ± 0.33  | -2.56 ± 0.35  |
| ATP syn5a              | 1.00 ± 0.10                 | -1.4 ± 0.09  | -1.81 ± 0.04  | -6.35 ± 0.04  |
| VDAC1                  | 1.00 ± 0.00                 | -3.49 ± 0.15 | -4.72 ± 0.08  | -4.76 ± 0.07  |
| VDAC2                  | 1.00 ± 0.10                 | -1.15 ± 0.29 | -1.04 ± 0.26  | -0.81 ± 0.05  |
| VDAC3                  | 1.00 ± 0.00                 | -0.94 ± 0.33 | -0.913 ± 0.14 | -0.90 ± 0.15  |
| <b>Differentiation</b> |                             |              |               |               |
| PR                     | 1.00                        | 1.05±0.24    | 1.51±0.41     | 3.051±0.70    |
| PRL                    | 1.00                        | 1.94±0.35    | 2.55±0.21     | 1.95±0.17     |
| ESR1                   | 1.00                        | 7.98±1.68    | 7.61±1.37     | 5.34±1.73     |
| <b>TF</b>              |                             |              |               |               |
| p53                    | 1.00 ± 0.03                 | 1.12 ± 0.01  | 6.29 ± 0.38   | 6.00 ± 0.36   |
| c-MYC                  | 1.00 ± 0.05                 | -1.06 ± 0.08 | -3.13 ± 0.14  | -2.64 ± 0.04  |
| HIF1-alpha             | 1.04 ± 0.05                 | -1.06 ± 0.09 | -1.25 ± 0.05  | -4.51± 0.04   |

**Table S2. Summary of The Expression Levels of Genes Associated with Metabolism, Stem Cells, Differentiation and Transcription Factors as a Function of The Number of Transfections of A549 Cells with si-hVDAC1 Relative to Transfection with si-NT; q-PCR Results**

| Transfection No:       | Fold change si-NT/siVDAC1 |              |              |               |
|------------------------|---------------------------|--------------|--------------|---------------|
|                        | 0                         | 2            | 3            | 4             |
| <b>Gene</b>            |                           |              |              |               |
| <b>Metabolism</b>      |                           |              |              |               |
| Glut1                  | 1.00 ± 0.1                | -1.37 ± 0.12 | -2.60 ± 0.21 | -3.09 ± 0.45  |
| HK-1                   | 1.00 ± 0.01               | -2.37 ± 0.23 | -1.03 ± 0.09 | -13.09 ± 1.97 |
| LDH                    | 1.00 ± 0.07               | -0.67 ± 0.10 | -1.34 ± 0.08 | -2.72 ± 0.22  |
| CS                     | 1.00 ± 0.13               | -0.93 ± 0.08 | -1.9 ± 0.21  | -4.12 ± 0.67  |
| ATP syn5a              | 1.00 ± 0.01               | -1.00 ± 0.10 | -2.02 ± 0.26 | -3.99 ± 0.54  |
| VDAC1                  | 1.00 ± 0.05               | -2.84 ± 0.05 | -8.46 ± 0.05 | -6.76 ± 0.01  |
| VDAC2                  | 1.00 ± 0.02               | -1.19 ± 0.01 | -1.17 ± 0.10 | -1.20 ± 0.05  |
| VDAC3                  | 1.00 ± 0.24               | -1.11 ± 0.30 | -0.96 ± 0.14 | -0.74 ± 0.05  |
| <b>Stem Cell</b>       |                           |              |              |               |
| CD133                  | 1.00 ± 0.02               | -1.13 ± 0.22 | -1.71 ± 0.13 | -2.24 ± 0.15  |
| EPCAM                  | 1.00 ± 0.05               | -0.76 ± 0.15 | -2.00 ± 0.15 | -1.89 ± 0.12  |
| ABCG2                  | 1.00 ± 0.09               | -0.98 ± 0.22 | -1.74 ± 0.13 | -2.31 ± 0.15  |
| NANOG                  | 1.00 ± 0.01               | -0.89 ± 0.20 | -2.12 ± 0.25 | -1.99 ± 0.24  |
| OCT3/4                 | 1.00 ± 0.05               | -0.95 ± 0.10 | -1.83 ± 0.11 | -1.88 ± 0.11  |
| <b>Differentiation</b> |                           |              |              |               |
| PDPN                   | 1.00 ± 0.01               | 0.84 ± 0.32  | 1.02 ± 0.42  | -2.71 ± 0.16  |
| HOPX                   | 1.00 ± 0.01               | -3.36 ± 1.63 | -3.23 ± 1.58 | -3.24 ± 0.40  |
| <b>TF</b>              |                           |              |              |               |
| p53                    | 1.00 ± 0.05               | 1.05 ± 0.20  | 2.69 ± 0.05  | 4.19 ± 0.05   |
| c-MYC                  | 1.00 ± 0.05               | -1.02 ± 0.24 | -1.96 ± 0.30 | -2.84 ± 0.05  |
| HIF1-alpha             | 1.04 ± 0.05               | -1.06 ± 0.50 | -1.40 ± 0.30 | -2.37 ± 0.05  |

**Table S3. Antibodies Used in This Study**

Antibodies against the indicated protein, their catalogue number, source, and the dilutions used in immunoblot and immunofluorescence experiments are presented.

| Antibodies                                         | Source and Cat. No.                                 | Dilution |         |       |
|----------------------------------------------------|-----------------------------------------------------|----------|---------|-------|
|                                                    |                                                     | IHC      | WB      | IF    |
| Mouse monoclonal anti- $\beta$ -actin              | Millipore, Billerica, MA, MAB1501                   | -        | 1:10000 | -     |
| Rabbit monoclonal anti-VDAC1                       | Abcam, Cambridge, UK , ab154856                     | -        | 1:5000  | -     |
| Rabbit monoclonal cytochrome c oxidase subunit IVc | Abcam, Cambridge, UK, ab150422                      | -        | 1:2000  | -     |
| Rabbit polyclonal anti -NGFR                       | Santa Cruz Biotechnology, Inc. Dallas, TX, sc-8317  | -        | 1:1000  | -     |
| Rabbit monoclonal anti-ALDH1                       | Abcam, Cambridge, UK , ab52492                      | -        | 1:2000  | -     |
| Rabbit polyclonal anti-BCL-xL                      | Abcam, Cambridge, UK , ab98143                      | -        | 1:4000  | -     |
| Mouse monoclonal anti-Ezrin                        | Santa Cruz Biotechnology, Inc. Dallas, TX, sc-58758 | -        | -       | 1:500 |
| Mouse monoclonal anti-Podoplanin                   | Abcam, Cambridge, UK, ab10288                       | -        | -       | 1:500 |
| Rabbit monoclonal anti-Glut1                       | Abcam, Cambridge, UK ab40084                        | -        | 1: 1500 | -     |
| Mouse monoclonal anti-GAPDH                        | Abcam, Cambridge, UK, ab9484                        | -        | 1:1000  | -     |
| Rabbit polyclonal anti-citrate synthase            | Abcam, Cambridge, UK ab96600                        | -        | 1:4000  | -     |
| Mouse monoclonal anti-Cytochrome c                 | B.D Bioscience, San Jose, CA, Cat. No 556432        | -        | 1:2000  | -     |
| Mouse monoclonal anti-ATP5a                        | Abcam, Cambridge, UK, ab14748                       | -        | 1:1000  | -     |
| Mouse monoclonal anti-HK-I                         | Abcam, Cambridge, UK ab105213                       | -        | 1:2000  | -     |
| Goat polyclonal anti-LDH-A                         | Santa Cruz Biotechnology, Inc. Dallas, TX, sc-27230 | -        | 1:1500  | -     |
| Rabbit monoclonal anti-LDH                         | Epitomics, Cambridge, UK, 1980-1                    | -        | 1:1000  | -     |
| Rabbit polyclonal anti-Nestin                      | Millipore, Billerica, MA, MAB353                    | -        | 1:1000  | 1:500 |
| Goat polyclonal anti-Sox2                          | Santa Cruz Biotechnology, Inc. Dallas, TX, sc-17320 | -        | 1:1500  | 1:300 |
| Rabbit polyclonal anti-KLF4                        | IMGEX Littleton, USA, IMG-6081-A                    | -        | 1:1000  | -     |
| Mouse monoclonal anti-CD133                        | Miltenyi Biotec GmbH , AC133                        | -        | 1:1500  | -     |
| Rabbit polyclonal anti-Prosulfactant protein C     | Abcam, ab90716                                      | -        | -       | 1:250 |
| Mouse monoclonal anti- $\beta$ III tubulin         | Abcam, Cambridge, UK ab7751                         | -        | 1:5000  | 1:200 |
| Mouse monoclonal anti-GFAP                         | Santa Cruz Biotechnology, Inc. Dallas, TX, sc-33673 | -        | 1:5000  | 1:150 |
| Rabbit polyclonal anti-AMPK-p                      | Abcam, Cambridge, UK, ab23875                       | -        | 1:5000  | -     |
| Rabbit polyclonal anti-pS6                         | Cell Signaling Technology, Danvers, USA, cat: 2215  | -        | 1:1000  | -     |
| Mouse monoclonal anti-P53                          | Santa Cruz Biotechnology, Inc. ,Dallas, TX, sc-126  | -        | 1:5000  | -     |

|                                            |                                                    |   |        |        |
|--------------------------------------------|----------------------------------------------------|---|--------|--------|
| Mouse monoclonal anti-ABCG2                | GeneTex, Irvine, CA, cat: GTX60447                 | - | 1:2000 | 1:500  |
| Rabbit polyclonal anti-CD44                | Abcam, Cambridge, UK, ab157107                     | - | 1:3000 | 1:1000 |
| Mouse monoclonal anti-ERB2/HER-2           | Biolegend, San Diego, CA, cat: 324401              | - | -      | 1:500  |
| Alexa Fluor 488 anti-mouse/human CD44      | Biolegend, San Diego, CA, cat: 103015              | - | -      | 1:500  |
| Goat anti-Rabbit IgG H&L (Alexa Fluor 555) | Abcam, Cambridge, UK, ab150086                     | - | -      | 1:500  |
| Cow polyclonal anti-goat IgG FITC          | Santa Cruz Biotechnology, Inc. Dallas, TX, sc-2348 | - | -      | 1:500  |
| Mouse monoclonal anti-CD24                 | Biolegend, San Diego, CA, cat: 311101              | - | -      | 1:500  |

**Table S4: Real-Time PCR Primers Used in This Study**

The genes examined and the forward and reverse sequences of the primers used are indicated.

| Gene             | Primer sequences                                                             |
|------------------|------------------------------------------------------------------------------|
| <i>β-Actin</i>   | Forward 5'-ACTCTTCCAGCCTTCCTTCC-3'<br>Reverse 5'-TGTTGGCGTACAGGTCTTTG-3'     |
| <i>VDAC1</i>     | Forward 5'-AATGACGGGACAGAGTTTGG<br>Reverse 5'-AGCGCGTGTACTGTTTCCT            |
| <i>VDAC2</i>     | Forward 5'-GGGACTTCCAGCTACACAC-3'<br>Reverse 5'-CCTGATGTCCAAGCAAGGTT-3'      |
| <i>VDAC3</i>     | Forward 5'-AATAATGCCAGCCTGATTGG-3'<br>Reverse 5'-CTTGTGACCTCCTGCACTGA-3'     |
| <i>GLUT1</i>     | Forward 5'-GGCCATCTTTTCTGTTGGGG-3'<br>Reverse 5'-TCAGCATTGAATTCCGCCG-3'      |
| <i>GAPDH</i>     | Forward 5'-TGGAAGGACTCATGACCACA-3'<br>Reverse 5'-ATGATGTTCTGGAGAGCCCC-3'     |
| <i>LDH-A</i>     | Forward 5'-GCAGGTGGTTGAGAGTGCTT-3'<br>Reverse 5'-GCACCCGCCTAAGATTCTTC-3'     |
| <i>CS</i>        | Forward 5'-AGGAACAGGTATCTTGGCTCT-3'<br>Reverse 5'-GGGGTGTAGATTGGTGGGAA-3'    |
| <i>ATP syn5a</i> | Forward 5'-TCAGTCTACGCCGCACTTAC-3'<br>Reverse 5'-GACATCTCAGCAGTCCCACA-3'     |
| <i>HK-1</i>      | Forward 5'-GTCTCAGTCCAGCACGTTT-3'<br>Reverse 5'-GAAACGCCGGAATACTGTG-3'       |
| <i>KLF4</i>      | Forward 5'-TGCCCCGAATAACCGCTG-3'<br>Reverse 5'-CGTTGAACTCCTCGGTCTCT-3'       |
| <i>ABCG2</i>     | Forward 5'-CACCTTATTGGCCTCAGGAA-3'<br>Reverse 5'-GAAACACTGGTTGGTTCGTC-3'     |
| <i>CD133</i>     | Forward 5'-TGGGCTTGTGATAACAGGAT-3'<br>Reverse 5'-TTGCGGTAAAAGTGGCTAAG-3'     |
| <i>EPCAM</i>     | Forward 5'-CTGGCCGTAAACTGCTTTGT-3'<br>Reverse 5'-TCCAAGTTTTGAGCCATTC-3'      |
| <i>Nestin</i>    | Forward 5'-GAAACAGCCATAGAGGGCAAA-3'<br>Reverse 5'-TGGTTTTCCAGAGTCTTCAGTGA-3' |

|                                  |                                                                                      |
|----------------------------------|--------------------------------------------------------------------------------------|
| <i>Nanog</i>                     | Forward 5'- TGGGATTTACAGGCGTGAGCCAC-3'<br>Reverse 5'- AAGCAAAGCCTCCCAATCCCAAAC-3'    |
| <i>SOX2</i>                      | Forward 5'- CCATGCAGGTTGACACCGTTG -3'<br>Reverse 5'-TCGGCAGACTGATTCAAATAA-3'         |
| <i>TUBB3</i>                     | Forward 5'-CTCAGGGGCCTTTGGACATC-3'<br>Reverse 5'-CAGGCAGTCGCAGTTTTTCAC-3'            |
| <i>MAP2</i>                      | Forward 5'-TCCAAAATCGGATCAACAGAC-3'<br>Reverse 5'- AGAGCCACATTTGGATGTCAC-3'          |
| <i>GFAP</i>                      | Forward 5'- AAGCTCCAGGATGAAACCAAC-3'<br>Reverse 5'- AGCGACTCAATCTTCCTCTCC-3'         |
| <i>c-Myc</i>                     | Forward 5'-GTAGTGGAAAACCAGCAGCC-3'<br>Reverse 5'- CCTCCTCGTCGCAGTAGAAA-3'            |
| <i>p53</i>                       | Forward 5'-AGGTTGGCTCTGACTGTACC-3'<br>Reverse 5'-AAAGCTGTTCCGTCACAGTA-3              |
| <i>Hif-1 <math>\alpha</math></i> | Forward 5'-CTGACCCTGCACTCAATCAA-3'<br>Reverse 5'- TCCATCGGAAGGACTAGGTG-3'            |
| <i>Cytochrome c</i>              | Forward 5'-TTTGGATCCAATGGGTGATGTTGAG-3<br>Reverse 5'TTGAATTCCCTATTAGTAGCTTTTTTTGAG-3 |
| <i>HOPX</i>                      | Forward 5'- TTAAGCAGGCTGGCATCAG-3'<br>Reverse 5'- TGCTCCGCTAGACCCTTCT-3'             |
| <i>Podoplanin</i>                | Forward 5'- ATCTGCCAACTTCAGAAAGCA-3'<br>Reverse 5'- TTGTCTGTGTGTCTCCATCCA-3'         |
| <i>PRLR</i>                      | Forward 5'-AATCTTGGCAGAGGCAGAAA-3'<br>Reverse 5'-TTTGGAGCTATCCCATTGC-3'              |
| <i>PR</i>                        | Forward 5'- GTCTACCCGCCCTATCTCAAC-3'<br>Reverse 5'- ACCATAATGACAGCCTGATGC-3'         |
| <i>ESRI</i>                      | Forward 5'-TGGAGATCTTCGACATGCTG -3'<br>Reverse 5'- TCCAGAGACTTCAGGGTGCT -3'          |
